# Supplementary material for: Anti-Obesity Effects of Polymethoxyflavone-Rich Fraction from Jinkyool (Citrus sunki Hort. ex Tanaka) Leaf on Obese Mice Induced by High-Fat Diet
Source: MDPI journal article supplement (doi:10.3390/nu14040865), 2022-02-18
Supplement: s1 [file s1]

Table S1. List of differentially expressed genes (DEGs) in HFD versus PRF 50 Groups.

| Gene symbol   | Description                                               | Fold Change |
|---------------|-----------------------------------------------------------|-------------|
| 1810011O10Rik | RIKEN cDNA 1810011O10 gene                                | 0.452       |
| 2010003K11Rik | RIKEN cDNA 2010003K11 gene                                | 0.413       |
| Abcc3         | ATP-binding cassette, sub-family C (CFTR /MRP), member 3  | 0.494       |
| Abhd6         | abhydrolase domain containing 6                           | 0.447       |
| Acaa1b        | acetyl-Coenzyme A acyltransferase 1B                      | 0.301       |
| Acot1         | acyl-CoA thioesterase 1                                   | 0.186       |
| Acot3         | acyl-CoA thioesterase 3                                   | 0.054       |
| Acot4         | acyl-CoA thioesterase 4                                   | 0.213       |
| Acs11         | acyl-CoA synthetase long-chain family member 1            | 0.469       |
| Acss3         | acyl-CoA synthetase short-chain family member 3           | 0.191       |
| Aldh3a2       | aldehyde dehydrogenase family 3, subfamily A2             | 0.368       |
| Anxa2         | annexin A2                                                | 0.471       |
| Apoa4         | apolipoprotein A-IV                                       | 0.230       |
| Aqp8          | aquaporin 8                                               | 0.460       |
| C1qa          | complement component 1, q subcomponent, alpha polypeptide | 2.561       |
| C1qb          | complement component 1, q subcomponent, beta polypeptide  | 2.806       |
| C1qc          | complement component 1, q subcomponent, C chain           | 2.759       |
| C6            | complement component 6                                    | 3.971       |
| C8a           | complement component 8, alpha polypeptide                 | 2.038       |
| C8b           | complement component 8, beta polypeptide                  | 2.633       |
| C9            | complement component 9                                    | 2.002       |
| Car3          | carbonic anhydrase 3                                      | 0.385       |
| Cd36          | CD36 antigen                                              | 0.185       |
| Cd52          | CD52 antigen                                              | 2.238       |

|          |                                                                     |       |
|----------|---------------------------------------------------------------------|-------|
| Cd5l     | CD5 antigen-like                                                    | 2.966 |
| Ces1d    | carboxylesterase 1D                                                 | 0.358 |
| Ces1e    | carboxylesterase 1E                                                 | 0.450 |
| Cfp      | complement factor properdin                                         | 2.713 |
| Cib3     | calcium and integrin binding family member 3                        | 6.993 |
| Clec4f   | C-type lectin domain family 4, member f                             | 2.512 |
| Crat     | carnitine acetyltransferase                                         | 0.359 |
| Csflr    | colony stimulating factor 1 receptor                                | 2.601 |
| Ctss     | cathepsin S                                                         | 2.328 |
| Cxcl1    | chemokine (C-X-C motif) ligand 1                                    | 3.012 |
| Cyba     | cytochrome b-245, alpha polypeptide                                 | 2.180 |
| Cyp1a2   | cytochrome P450, family 1, subfamily a, polypeptide 2               | 2.056 |
| Cyp2b9   | cytochrome P450, family 2, subfamily b, polypeptide 9               | 0.016 |
| Cyp2c38  | cytochrome P450, family 2, subfamily c, polypeptide 38              | 0.229 |
| Cyp3a11  | cytochrome P450, family 3, subfamily a, polypeptide 11              | 0.362 |
| Cyp3a59  | cytochrome P450, family 3, subfamily a, polypeptide 59              | 0.416 |
| Cyp4a10  | cytochrome P450, family 4, subfamily a, polypeptide 10              | 0.079 |
| Cyp4a12a | cytochrome P450, family 4, subfamily a, polypeptide 12a             | 0.416 |
| Cyp4a14  | cytochrome P450, family 4, subfamily a, polypeptide 14              | 0.034 |
| Cyp7a1   | cytochrome P450, family 7, subfamily a, polypeptide 1               | 2.206 |
| Cyp7b1   | cytochrome P450, family 7, subfamily b, polypeptide 1               | 2.513 |
| Dnajc12  | DnaJ heat shock protein family (Hsp40) member C12                   | 2.725 |
| Egfr     | epidermal growth factor receptor                                    | 3.365 |
| Ehhadh   | enoyl-Coenzyme A, hydratase /3-hydroxyacyl Coenzyme A dehydrogenase | 0.484 |
| Eif4ebp3 | eukaryotic translation initiation factor 4E binding protein 3       | 2.243 |
| Elov15   | ELOVL family member 5, elongation of long chain fatty acids (yeast) | 0.456 |
| Enho     | energy homeostasis associated                                       | 5.905 |

|          |                                                                                          |        |
|----------|------------------------------------------------------------------------------------------|--------|
| Fabp2    | fatty acid binding protein 2, intestinal                                                 | 0.466  |
| Fabp5    | fatty acid binding protein 5, epidermal                                                  | 2.733  |
| Fabp7    | fatty acid binding protein 7, brain                                                      | 2.376  |
| Fcer1g   | Fc receptor, IgE, high affinity I, gamma polypeptide                                     | 2.224  |
| Fcna     | ficolin A                                                                                | 2.417  |
| Fgl1     | fibrinogen-like protein 1                                                                | 3.077  |
| Fitm1    | fat storage-inducing transmembrane protein 1                                             | 0.439  |
| G0s2     | G0 /G1 switch gene 2                                                                     | 0.261  |
| G6pc     | glucose-6-phosphatase, catalytic                                                         | 0.233  |
| Gm4952   | predicted gene 4952                                                                      | 0.488  |
| Gngt2    | guanine nucleotide binding protein (G protein), gamma transducing activity polypeptide 2 | 2.152  |
| Gstp1    | glutathione S-transferase, pi 1                                                          | 4.350  |
| Hamp2    | hepcidin antimicrobial peptide 2                                                         | 2.207  |
| Hhex     | hematopoietically expressed homeobox                                                     | 2.049  |
| Hmox1    | heme oxygenase 1                                                                         | 2.882  |
| Hp       | haptoglobin                                                                              | 2.166  |
| Hpx      | hemopexin                                                                                | 2.303  |
| Hsd3b5   | hydroxy-delta-5-steroid dehydrogenase, 3 beta- and steroid delta-isomerase 5             | 6.441  |
| Ifi27l2a | interferon, alpha-inducible protein 27 like 2A                                           | 2.697  |
| Inhbe    | inhibin beta-E                                                                           | 0.438  |
| Lbp      | lipopolysaccharide binding protein                                                       | 2.237  |
| Lcn2     | lipocalin 2                                                                              | 13.831 |
| Lgals1   | lectin, galactose binding, soluble 1                                                     | 0.251  |
| Lgm1     | legumain                                                                                 | 2.117  |
| Lrg1     | leucine-rich alpha-2-glycoprotein 1                                                      | 2.364  |
| Lst1     | leukocyte specific transcript 1                                                          | 2.038  |

|           |                                                                                |        |
|-----------|--------------------------------------------------------------------------------|--------|
| Ly6e      | lymphocyte antigen 6 complex, locus E                                          | 2.269  |
| Lyz2      | lysozyme 2                                                                     | 2.518  |
| Marco     | macrophage receptor with collagenous structure                                 | 9.314  |
| Me1       | malic enzyme 1, NADP(+)-dependent, cytosolic                                   | 0.298  |
| Mfsd2a    | major facilitator superfamily domain containing 2A                             | 0.369  |
| Mme       | membrane metallo endopeptidase                                                 | 0.356  |
| Moxd1     | monooxygenase, DBH-like 1                                                      | 21.842 |
| Mpeg1     | macrophage expressed gene 1                                                    | 2.501  |
| Mup20     | major urinary protein 20                                                       | 2.552  |
| Orm2      | orosomucoid 2                                                                  | 17.617 |
| Paqr7     | progesterone and adiponectin receptor family member VII                        | 0.469  |
| Pex11a    | peroxisomal biogenesis factor 11 alpha                                         | 0.292  |
| Pklr      | pyruvate kinase liver and red blood cell                                       | 0.442  |
| Pla2g6    | phospholipase A2, group VI                                                     | 0.473  |
| Plin2     | .                                                                              | 0.351  |
| Ppp1r3b   | protein phosphatase 1, regulatory (inhibitor) subunit 3B                       | 0.443  |
| Rdh16     | retinol dehydrogenase 16                                                       | 0.407  |
| Retsat    | retinol saturase (all trans retinol 13,14 reductase)                           | 0.394  |
| Rgs16     | regulator of G-protein signaling 16                                            | 0.464  |
| Rnase4    | ribonuclease, RNase A family 4                                                 | 2.098  |
| Saa1      | serum amyloid A 1                                                              | 12.793 |
| Saa2      | serum amyloid A 2                                                              | 11.592 |
| Sdc3      | syndecan 3                                                                     | 2.754  |
| Selenbp2  | selenium binding protein 2                                                     | 10.672 |
| Serpina1e | serine (or cysteine) peptidase inhibitor, clade A, member 1E                   | 15.511 |
| Slc16a7   | solute carrier family 16 (monocarboxylic acid transporters), member 7          | 0.459  |
| Slc25a25  | solute carrier family 25 (mitochondrial carrier, phosphate carrier), member 25 | 0.499  |

|          |                                                |        |
|----------|------------------------------------------------|--------|
| Slc25a47 | solute carrier family 25, member 47            | 0.425  |
| Slc3a1   | solute carrier family 3, member 1              | 2.696  |
| Steap4   | STEAP family member 4                          | 2.208  |
| Tceal8   | transcription elongation factor A (SII)-like 8 | 0.472  |
| Tff3     | trefoil factor 3, intestinal                   | 19.510 |
| Thrsp    | thyroid hormone responsive                     | 0.262  |
| Tsc22d1  | TSC22 domain family, member 1                  | 0.442  |
| Tsku     | tsukushi, small leucine rich proteoglycan      | 0.444  |
| Txnip    | thioredoxin interacting protein                | 0.484  |
| Tyrobp   | TYRO protein tyrosine kinase binding protein   | 2.174  |
| Vnn1     | vanin 1                                        | 0.317  |
| Vsig4    | V-set and immunoglobulin domain containing 4   | 2.383  |
| Wfdc17   | WAP four-disulfide core domain 17              | 2.242  |

---
